# Supplementary material
Source: publisher figshare collection journal article supplement (https://acs.figshare.com/ndownloader/files/4662715)
Supplement: Supplementary file 1 [file 4662715]

Supporting Information for

Accurate Determination and Modeling of the  
Dispersion of the First Hyperpolarizability of an  
Efficient Zwitterionic Nonlinear Optical Chromophore  
by Tunable Wavelength Hyper-Rayleigh Scattering

*Jochen Campo,<sup>[a]</sup> Wim Wenseleers,\*<sup>[a]</sup> Etienne Goovaerts,<sup>[a]</sup> Marek Szablewski,<sup>[b]</sup> Graham H. Cross<sup>[b]</sup>*

<sup>[a]</sup>Department of Physics, University of Antwerp (campus Drie Eiken), Universiteitsplein 1, B-2610  
Antwerpen, Belgium

<sup>[b]</sup>Department of Physics, Durham University, Durham, United Kingdom DH1 3LE

[Wim.Wenseleers@ua.ac.be](mailto:Wim.Wenseleers@ua.ac.be)

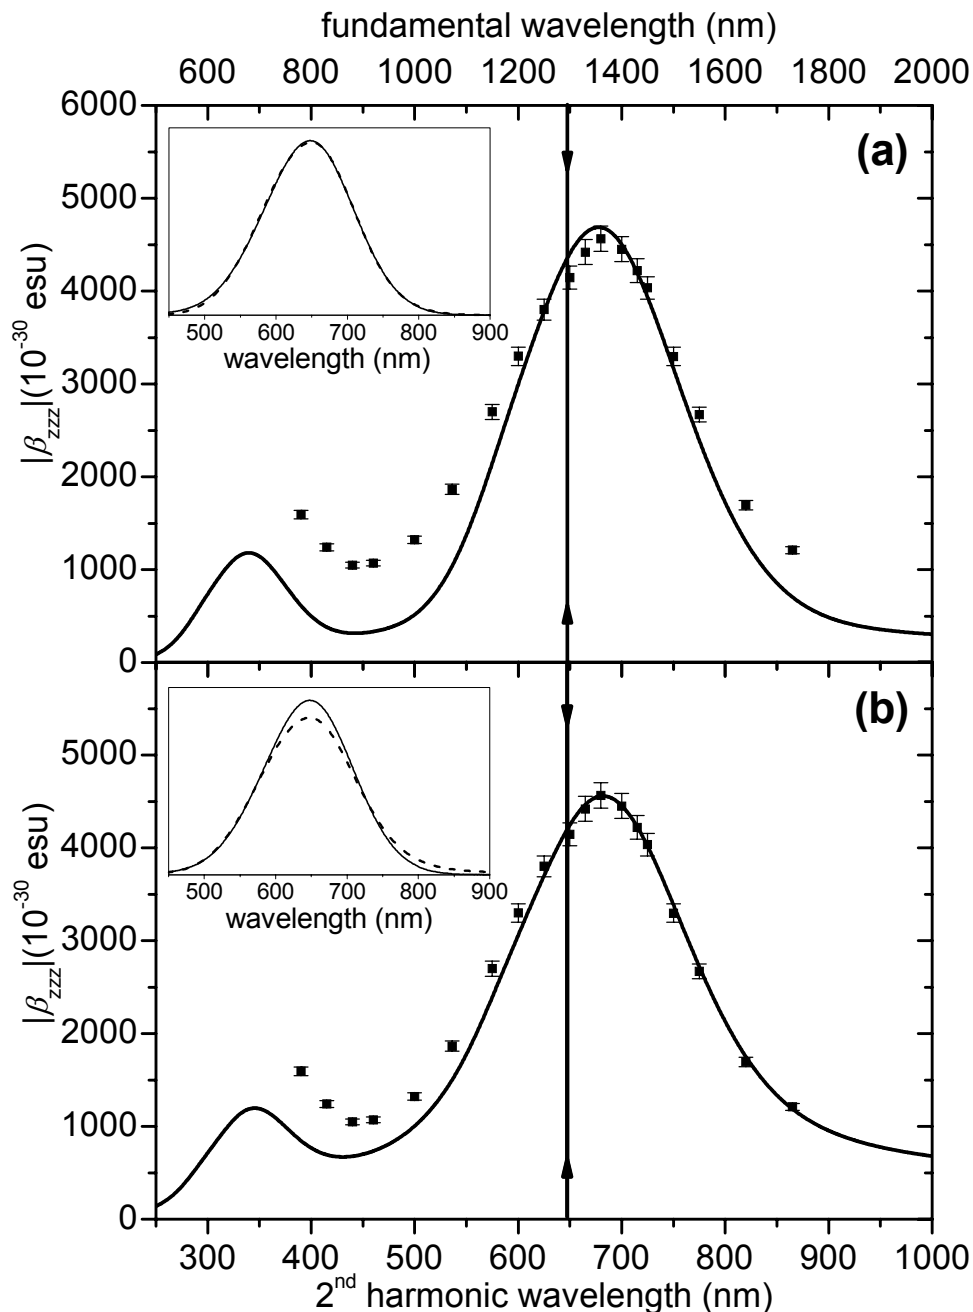

**Figure S1.** The single-mode vibronic model (curve) fitted to the experimental HRS data in DMF (squares; in DMF- $d_7$  at the SH wavelengths of 820 and 865 nm), corrected for the  $\beta$  dispersion of the pure solvent. Only the two-photon resonant  $\beta$  values (at SH wavelengths  $\geq 600$  nm) are taken into account in the fitting procedure. The vertical arrows indicate  $\lambda_{\text{max}}$ . In (a) only the amplitude is optimized to fit the data but in (b) also the homogeneous width is used as a fit parameter (yielding  $\gamma = 190 \text{ cm}^{-1}$  and  $\beta_0 = 323 \times 10^{-30} \text{ esu}$ ). The insets in both figures show the absorption band calculated using identical parameters as for  $\beta$  (dashed line), compared to the experimental spectrum (solid line), nearly coinciding in (a), while showing an unacceptable deviation in (b).
